# Supplementary material
Source: PubMed Central journal article supplement (PMC2000489)

**A**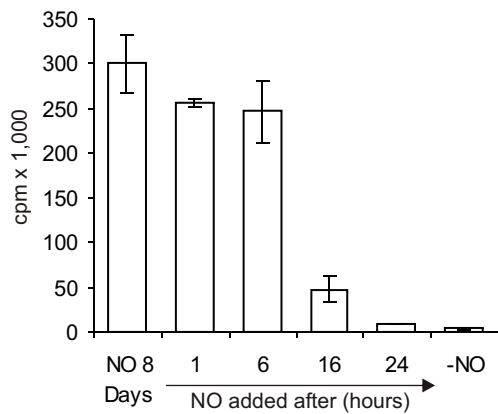**B**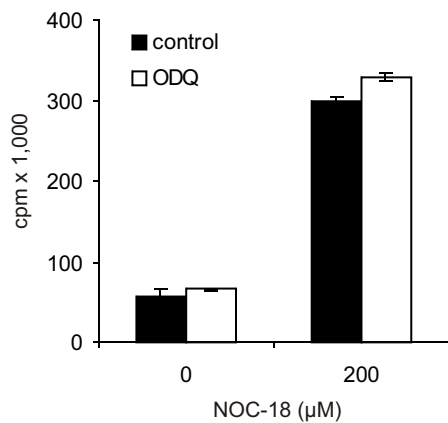**C**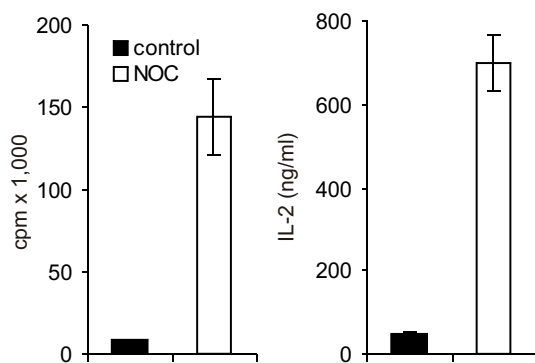

Supplement: pnas_0703725104_1.pdf [file pnas_0703725104_1.pdf]

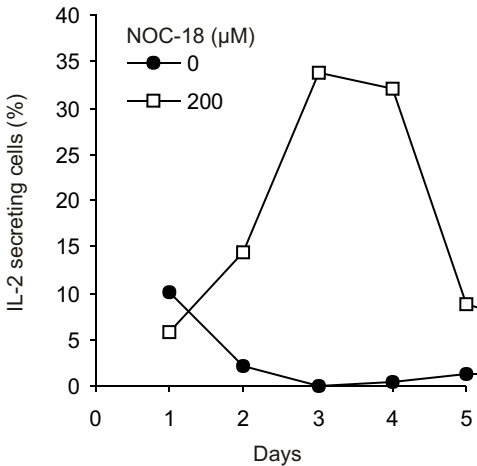

Supplement: pnas_0703725104_2.pdf [file pnas_0703725104_2.pdf]

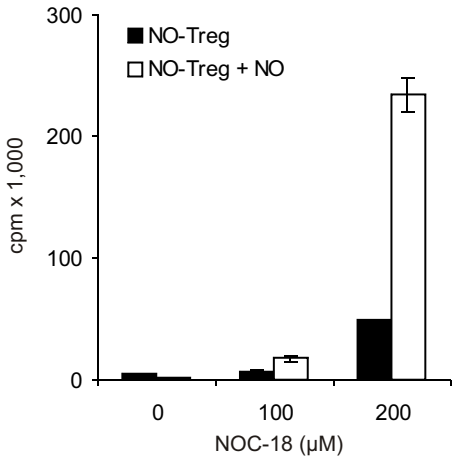

Supplement: pnas_0703725104_3.pdf [file pnas_0703725104_3.pdf]

**A**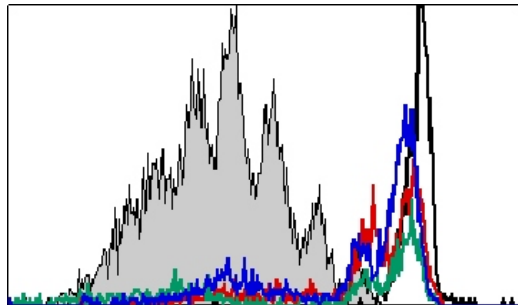**B**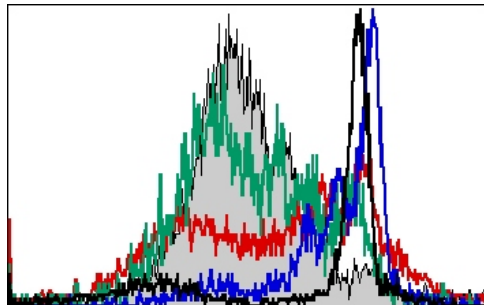**C**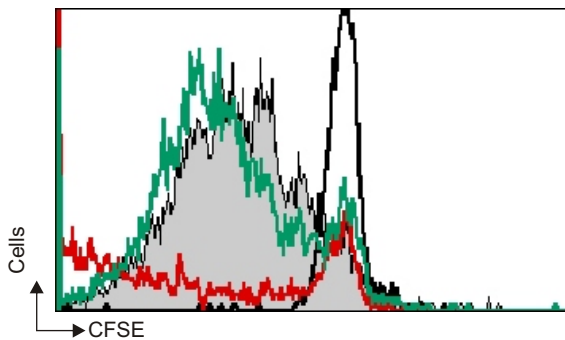

Supplement: pnas_0703725104_4.pdf [file pnas_0703725104_4.pdf]

**A**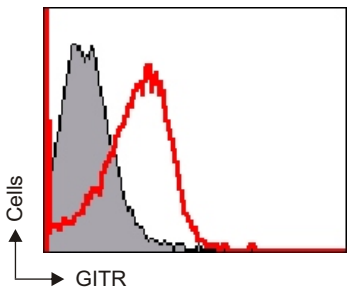**B**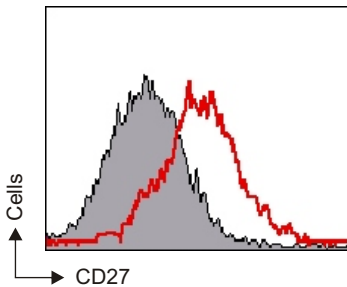

Supplement: pnas_0703725104_5.pdf [file pnas_0703725104_5.pdf]

**A**

control

NO-Treg

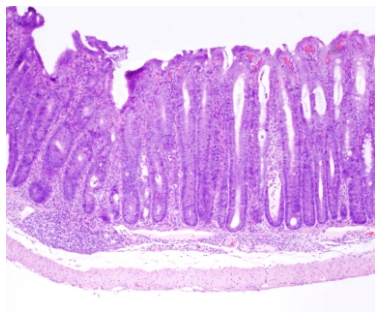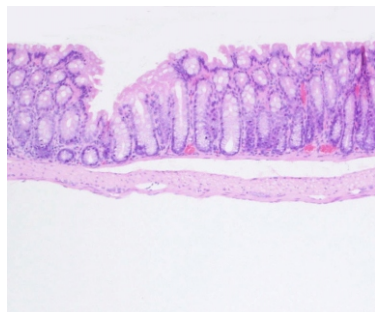**B**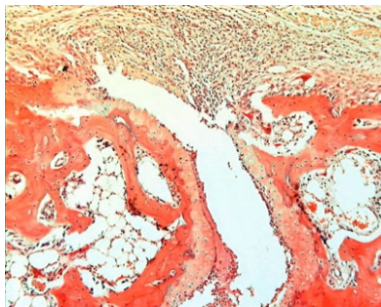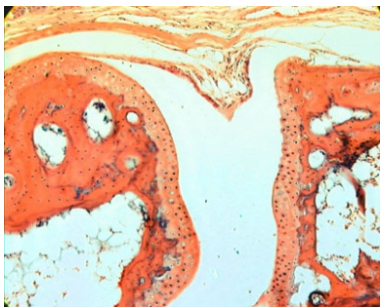

Supplement: pnas_0703725104_6.pdf [file pnas_0703725104_6.pdf]
